# Supplementary material for: Comprehensive profiling of translation initiation in influenza virus infected cells
Source: PubMed Central journal article supplement (PMC6361465; doi:10.1371/journal.ppat.1007518), 2019-01-23
Supplement: ppat.1007518.s005.pdf [file ppat.1007518.s005.pdf]

**A**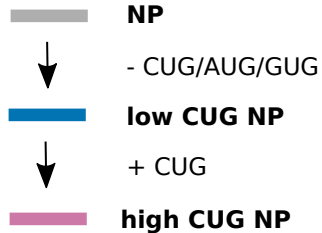**B**

| Codon      | Reading frame 0 | Reading frame 1 | Reading frame 2 |
|------------|-----------------|-----------------|-----------------|
| <b>GUG</b> | 9 → 3           | 11 → 0          | 5 → 5           |
| <b>AUG</b> | 25 → 25         | 19 → 4          | 1 → 0           |
| <b>CUG</b> | 6 → 0           | 16 → 0          | 6 → 0           |
