# Supplementary material for: Comprehensive profiling of translation initiation in influenza virus infected cells
Source: PubMed Central journal article supplement (PMC6361465; doi:10.1371/journal.ppat.1007518), 2019-01-23
Supplement: ppat.1007518.s009.pdf [file ppat.1007518.s009.pdf]

| sample   | codon | segment | frame | peptide length (aa) | distance to aTIS (nt) | ribo pval | LTM pval | called in |
|----------|-------|---------|-------|---------------------|-----------------------|-----------|----------|-----------|
| +ifn+vir | AUG   | HA      | 0     | 565                 | 0                     | 2e-01     | 1e-14    | both      |
| +vir     | AUG   | HA      | 0     | 565                 | 0                     | 8e-02     | 0e+00    | both      |
| +ifn+vir | AUG   | M       | 1     | 16                  | 88                    | 4e-01     | 8e-06    | both      |
| +vir     | AUG   | M       | 1     | 16                  | 88                    | 6e-01     | 7e-06    | both      |
| +ifn+vir | AUG   | M       | 0     | 252                 | 0                     | 8e-14     | 0e+00    | both      |
| +vir     | AUG   | M       | 0     | 252                 | 0                     | 3e-14     | 0e+00    | both      |
| +ifn+vir | AUG   | NA      | 2     | 2                   | 95                    | 1e-03     | 9e-09    | both      |
| +vir     | AUG   | NA      | 2     | 2                   | 95                    | 5e-05     | 0e+00    | both      |
| +ifn+vir | AUG   | NA      | 0     | 453                 | 0                     | 5e-02     | 4e-15    | both      |
| +vir     | AUG   | NA      | 0     | 453                 | 0                     | 5e-02     | 0e+00    | both      |
| +ifn+vir | AUG   | NA      | 0     | 439                 | 42                    | 1e-03     | 1e-10    | both      |
| +vir     | AUG   | NA      | 0     | 439                 | 42                    | 1e-04     | 0e+00    | both      |
| +ifn+vir | AUG   | NP      | 0     | 498                 | 0                     | 3e-01     | 0e+00    | both      |
| +vir     | AUG   | NP      | 0     | 498                 | 0                     | 2e-01     | 0e+00    | both      |
| +ifn+vir | AUG   | NP      | 0     | 362                 | 408                   | 7e-02     | 3e-14    | both      |
| +vir     | AUG   | NP      | 0     | 362                 | 408                   | 7e-02     | 3e-07    | both      |
| +ifn+vir | AUG   | NS      | 0     | 230                 | 0                     | 1e-01     | 0e+00    | both      |
| +vir     | AUG   | NS      | 0     | 230                 | 0                     | 7e-02     | 0e+00    | both      |
| +ifn+vir | AUG   | PA      | 0     | 716                 | 0                     | 3e-01     | 2e-08    | both      |
| +vir     | AUG   | PA      | 0     | 716                 | 0                     | 2e-01     | 2e-13    | both      |
| +ifn+vir | AUG   | PA      | 0     | 631                 | 255                   | 1e-02     | 1e-08    | both      |
| +vir     | AUG   | PA      | 0     | 631                 | 255                   | 3e-03     | 3e-07    | both      |
| +ifn+vir | AUG   | PB1     | 1     | 87                  | 94                    | 1e-01     | 2e-11    | both      |
| +vir     | AUG   | PB1     | 1     | 87                  | 94                    | 6e-02     | 0e+00    | both      |
| +ifn+vir | AUG   | PB1     | 0     | 757                 | 0                     | 3e-01     | 2e-07    | both      |
| +vir     | AUG   | PB1     | 0     | 757                 | 0                     | 3e-01     | 2e-14    | both      |
| +vir     | AUG   | PA      | 1     | 1                   | 1156                  | 2e-01     | 1e-04    | +vir      |
| +vir     | AUG   | PB2     | 0     | 759                 | 0                     | 6e-01     | 2e-04    | +vir      |
| +ifn+vir | AUG   | HA      | 2     | 7                   | 800                   | 2e-01     | 2e-06    | +ifn+vir  |
| +ifn+vir | AUG   | M       | 0     | 5                   | 741                   | 5e-04     | 4e-08    | +ifn+vir  |
| +ifn+vir | AUG   | NS      | 0     | 150                 | 240                   | 4e-01     | 3e-04    | +ifn+vir  |
| +ifn+vir | AUG   | PA      | 2     | 17                  | 113                   | 4e-01     | 2e-04    | +ifn+vir  |
| +ifn+vir | other | NP      | n.a.  | n.a.                | n.a.                  | 9e-03     | 7e-06    | both      |
| +vir     | other | NP      | n.a.  | n.a.                | n.a.                  | 5e-03     | 3e-06    | both      |
| +vir     | other | HA      | n.a.  | n.a.                | n.a.                  | 5e-02     | 4e-05    | +vir      |
| +vir     | other | M       | n.a.  | n.a.                | n.a.                  | 2e-01     | 1e-04    | +vir      |
| +vir     | other | PA      | n.a.  | n.a.                | n.a.                  | 4e-01     | 1e-04    | +vir      |
| +vir     | other | PB1     | n.a.  | n.a.                | n.a.                  | 4e-02     | 1e-05    | +vir      |
| +vir     | other | PB2     | n.a.  | n.a.                | n.a.                  | 2e-01     | 6e-05    | +vir      |
