# Supplementary material for: Comprehensive profiling of translation initiation in influenza virus infected cells
Source: PubMed Central journal article supplement (PMC6361465; doi:10.1371/journal.ppat.1007518), 2019-01-23
Supplement: ppat.1007518.s011.pdf [file ppat.1007518.s011.pdf]

| influenza segment | protein      | distance to aTIS (nt) | protein length (aa) | frame |
|-------------------|--------------|-----------------------|---------------------|-------|
| PB1               | PB1-F2 [14]  | 118                   | 87                  | 1     |
| PB1               | PB1-N40 [17] | 141                   | 718                 | 0     |
| PA                | PA-N155 [20] | 486                   | 568                 | 0     |
| PA                | PA-N182 [20] | 567                   | 535                 | 0     |
| M                 | M42 [21]     | 113                   | 99                  | 1     |
