# Supplementary material for: Comprehensive profiling of translation initiation in influenza virus infected cells
Source: PubMed Central journal article supplement (PMC6361465; doi:10.1371/journal.ppat.1007518), 2019-01-23

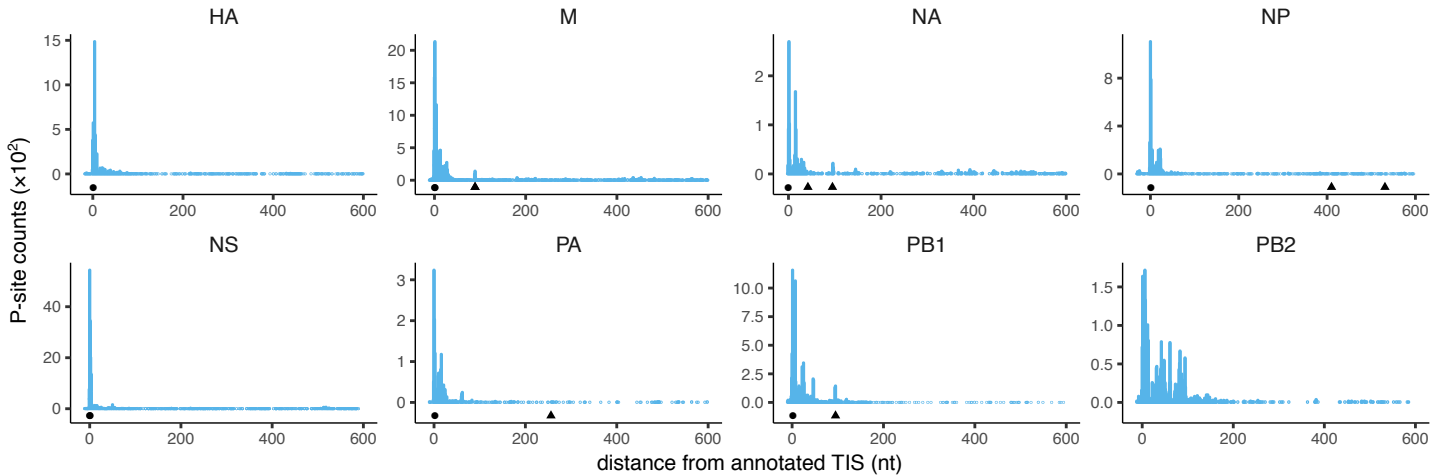

Supplement: ppat.1007518.s012.pdf [file ppat.1007518.s012.pdf]
