# Supplementary material for: Comprehensive profiling of translation initiation in influenza virus infected cells
Source: PubMed Central journal article supplement (PMC6361465; doi:10.1371/journal.ppat.1007518), 2019-01-23

**A**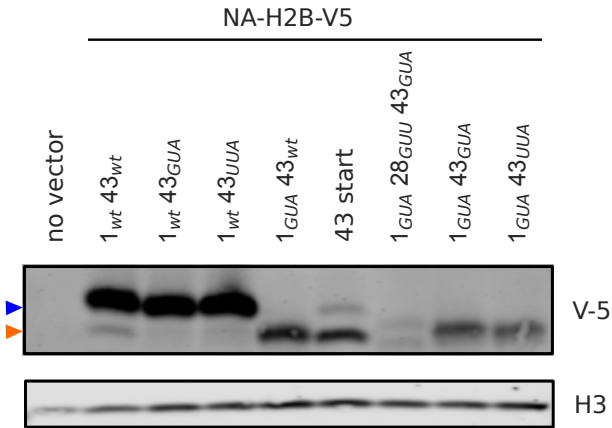**B**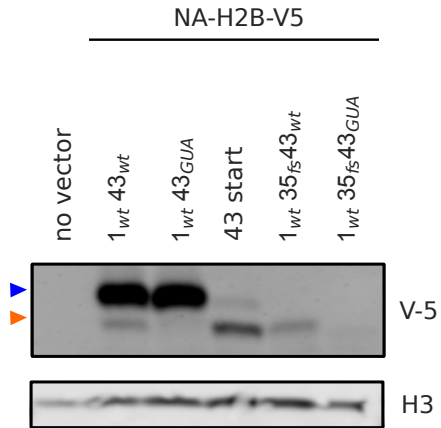

Supplement: ppat.1007518.s017.pdf [file ppat.1007518.s017.pdf]
